# Supplementary material
Source: publisher figshare collection journal article supplement (https://acs.figshare.com/ndownloader/files/25480771)
Supplement: Supplementary file 1 [file 25480771]

**Supporting Information for**  
**Ultrafast Nonradiative Decay of a Dipolar Plasmon-like State in Naphthalene**

Gowri U. Kuda-Singappulige<sup>a</sup>, Andrew Wildman<sup>b</sup>, David B. Lingerfelt<sup>b,c</sup>, Xiaosong Li<sup>b</sup> & Christine M. Aikens<sup>a,\*</sup>

<sup>a</sup>Department of Chemistry, Kansas State University, Manhattan, KS 66506, USA

<sup>b</sup>Department of Chemistry, University of Washington, Seattle, WA 98195, USA

<sup>c</sup>Center for Nanophase Materials Sciences, Oak Ridge National Laboratory, Oak Ridge, TN 37831, USA

\* cmaikens@ksu.edu, 1-785-532-0954, fax: 1-785-532-6666

**Table S1.** Optimized coordinates of naphthalene at the B3LYP/6-31G(d,p) level of theory

|   |           |          |           |
|---|-----------|----------|-----------|
| H | -1.245080 | 0.000000 | 3.377170  |
| C | -0.708340 | 0.000000 | 2.433020  |
| H | -2.489500 | 0.000000 | 1.242170  |
| C | -1.402480 | 0.000000 | 1.244600  |
| C | 1.402480  | 0.000000 | 1.244600  |
| C | -0.716870 | 0.000000 | 0.000000  |
| C | 0.708340  | 0.000000 | 2.433020  |
| C | 0.716870  | 0.000000 | 0.000000  |
| C | -1.402480 | 0.000000 | -1.244600 |
| H | 1.245080  | 0.000000 | 3.377170  |
| H | 2.489500  | 0.000000 | -1.242170 |
| H | 2.489500  | 0.000000 | 1.242170  |
| C | -0.708340 | 0.000000 | -2.433020 |
| H | -2.489500 | 0.000000 | -1.242170 |
| H | -1.245080 | 0.000000 | -3.377170 |
| C | 0.708340  | 0.000000 | -2.433020 |
| H | 1.245080  | 0.000000 | -3.377170 |
| C | 1.402480  | 0.000000 | -1.244600 |

**Table S2.** MO transitions responsible for the  $\alpha$  peak,  $\beta$  peak, three p-band peaks and the 6<sup>th</sup> excited state for the equilibrium geometry of naphthalene at the B3LYP/6-31G(d,p) level of theory.

| Classification                | Energy (eV) | Wavelength (nm) | Oscillator strength | Transitions                     | Weight |
|-------------------------------|-------------|-----------------|---------------------|---------------------------------|--------|
| p-band 1                      | 4.46        | 278.18          | 0.0603              | HOMO – 1 $\rightarrow$ LUMO + 1 | 0.157  |
|                               |             |                 |                     | HOMO $\rightarrow$ LUMO         | 0.685  |
| $\alpha$ peak                 | 4.52        | 274.27          | 0.0002              | HOMO – 1 $\rightarrow$ LUMO     | 0.505  |
|                               |             |                 |                     | HOMO $\rightarrow$ LUMO + 1     | -0.493 |
| $\beta$ peak                  | 6.10        | 203.20          | 1.2078              | HOMO – 1 $\rightarrow$ LUMO     | 0.493  |
|                               |             |                 |                     | HOMO $\rightarrow$ LUMO + 1     | 0.506  |
| p-band 2                      | 6.26        | 197.94          | 0.1821              | HOMO – 2 $\rightarrow$ LUMO + 2 | 0.161  |
|                               |             |                 |                     | HOMO – 1 $\rightarrow$ LUMO + 1 | 0.673  |
|                               |             |                 |                     | HOMO $\rightarrow$ LUMO         | -0.139 |
| 6 <sup>th</sup> Excited State | 6.37        | 194.71          | 0.0000              | HOMO – 3 $\rightarrow$ LUMO     | 0.125  |
|                               |             |                 |                     | HOMO – 2 $\rightarrow$ LUMO + 1 | 0.498  |
|                               |             |                 |                     | HOMO – 1 $\rightarrow$ LUMO + 2 | -0.480 |
| p-band 3                      | 8.22        | 150.74          | 0.4716              | HOMO – 2 $\rightarrow$ LUMO + 2 | 0.679  |
|                               |             |                 |                     | HOMO – 1 $\rightarrow$ LUMO + 1 | -0.138 |
|                               |             |                 |                     | HOMO $\rightarrow$ LUMO         | 0.113  |

**Table S3.** Normal modes of naphthalene, their symmetry representations, and their energies

| Mode | Symmetry | Energy              |       | Mode | Symmetry | Energy              |       |
|------|----------|---------------------|-------|------|----------|---------------------|-------|
|      |          | (cm <sup>-1</sup> ) | (eV)  |      |          | (cm <sup>-1</sup> ) | (eV)  |
| 1    | $B_{2u}$ | 176.57              | 0.022 | 25   | $B_{3u}$ | 1154.58             | 0.143 |
| 2    | $A_u$    | 189.61              | 0.024 | 26   | $B_{2g}$ | 1177.30             | 0.146 |
| 3    | $B_{3u}$ | 364.09              | 0.045 | 27   | $B_{1u}$ | 1178.05             | 0.146 |
| 4    | $B_{3g}$ | 397.05              | 0.049 | 28   | $A_g$    | 1189.20             | 0.147 |
| 5    | $B_{1g}$ | 481.18              | 0.060 | 29   | $B_{1u}$ | 1240.97             | 0.154 |
| 6    | $B_{2u}$ | 491.96              | 0.061 | 30   | $B_{2g}$ | 1272.80             | 0.158 |
| 7    | $B_{2g}$ | 517.83              | 0.064 | 31   | $B_{3u}$ | 1291.69             | 0.160 |
| 8    | $A_g$    | 520.51              | 0.065 | 32   | $B_{1u}$ | 1407.82             | 0.175 |
| 9    | $A_u$    | 633.74              | 0.079 | 33   | $A_g$    | 1415.74             | 0.176 |
| 10   | $B_{1u}$ | 634.99              | 0.079 | 34   | $B_{3u}$ | 1424.94             | 0.177 |
| 11   | $B_{3g}$ | 734.91              | 0.091 | 35   | $B_{2g}$ | 1501.48             | 0.186 |
| 12   | $A_g$    | 776.04              | 0.096 | 36   | $A_g$    | 1502.53             | 0.186 |
| 13   | $B_{1g}$ | 784.42              | 0.097 | 37   | $B_{1u}$ | 1562.44             | 0.194 |
| 14   | $B_{2u}$ | 803.36              | 0.100 | 38   | $A_g$    | 1628.24             | 0.202 |
| 15   | $B_{3u}$ | 807.57              | 0.100 | 39   | $B_{3u}$ | 1655.90             | 0.205 |
| 16   | $A_u$    | 853.64              | 0.106 | 40   | $B_{2g}$ | 1686.24             | 0.209 |
| 17   | $B_{1g}$ | 899.19              | 0.111 | 41   | $B_{2g}$ | 3173.11             | 0.393 |
| 18   | $B_{2g}$ | 947.96              | 0.118 | 42   | $B_{3u}$ | 3174.91             | 0.394 |
| 19   | $B_{3g}$ | 951.78              | 0.118 | 43   | $B_{1u}$ | 3176.77             | 0.394 |
| 20   | $B_{2u}$ | 968.40              | 0.120 | 44   | $A_g$    | 3180.25             | 0.394 |
| 21   | $A_u$    | 989.08              | 0.123 | 45   | $B_{2g}$ | 3191.63             | 0.396 |
| 22   | $B_{1g}$ | 997.04              | 0.124 | 46   | $B_{3u}$ | 3192.82             | 0.396 |
| 23   | $B_{1u}$ | 1042.85             | 0.129 | 47   | $B_{1u}$ | 3204.69             | 0.397 |
| 24   | $A_g$    | 1053.49             | 0.131 | 48   | $A_g$    | 3205.87             | 0.397 |

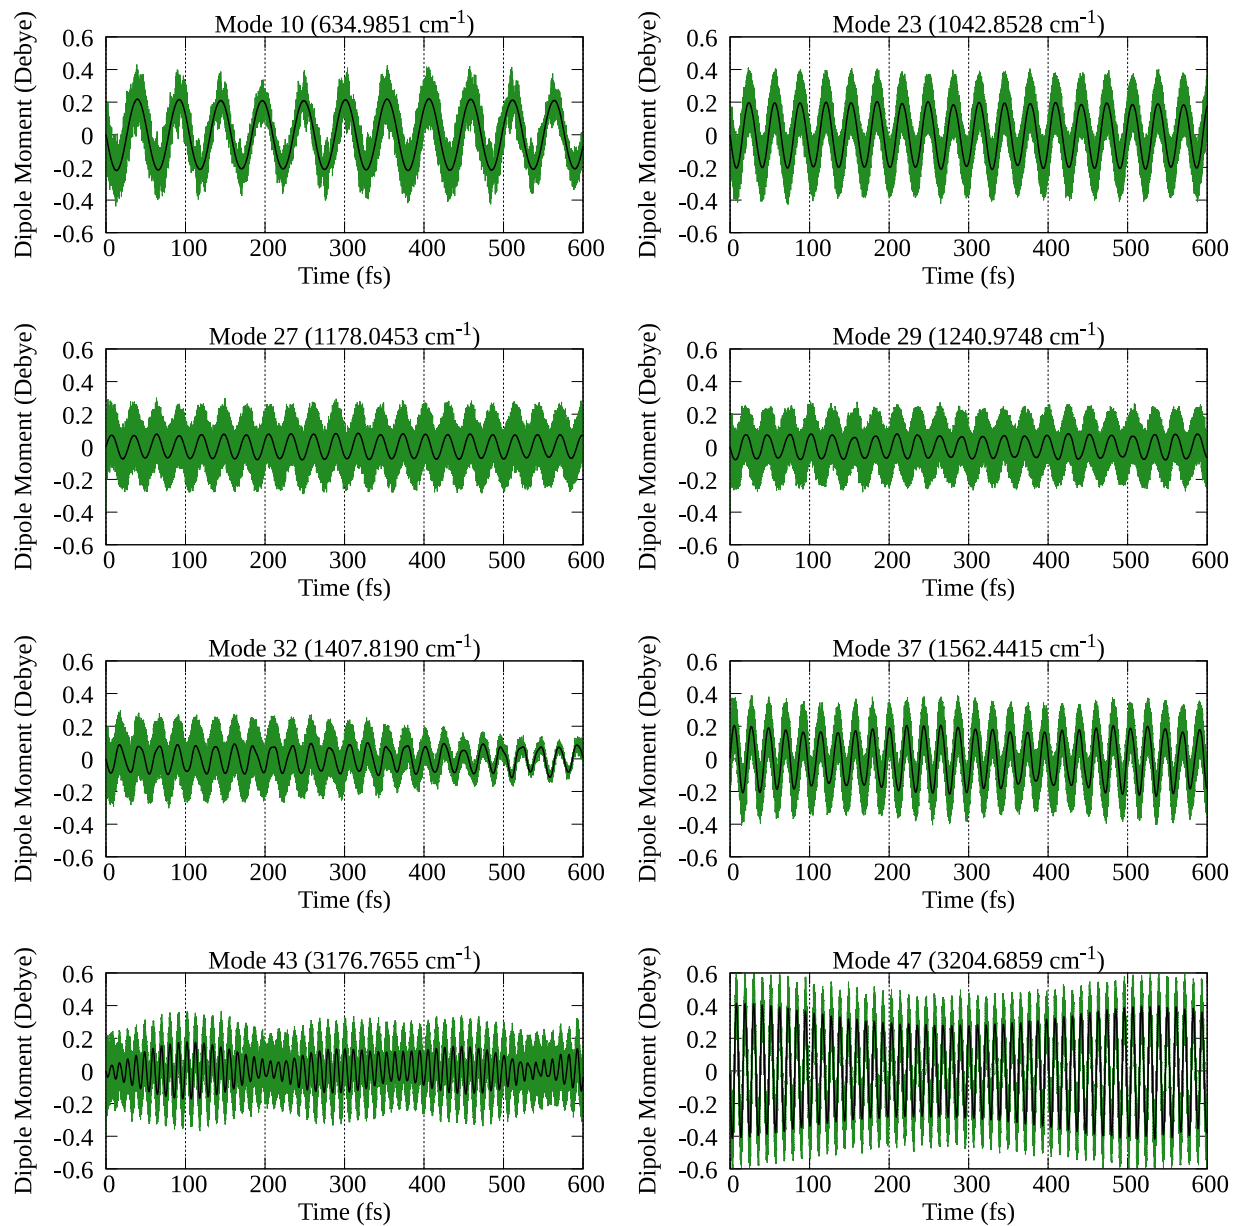

**Figure S1.** Variation of the  $z$ -component of the dipole moment for  $B_{1u}$  normal modes of naphthalene. Green: Average dipole moment during an Ehrenfest dynamics with electrons excited along the  $z$  direction and black: Born-Oppenheimer molecular dynamics (BOMD) in the ground electronic state.

## Symmetry-adapted selection rules for pure electronic transitions and vibronic transitions<sup>1</sup>

The intensity of a transition from state  $i$  to state  $j$  is given by eq S1 where  $\hat{\mu}$  is the transition dipole moment operator and  $\psi_i$  and  $\psi_j$  are the initial and final electronic wave functions respectively. Note that to a first approximation, the total wavefunction  $\Psi$  for a molecule can be written as a product of an electronic wavefunction  $\psi_e$ , a vibrational wavefunction  $\psi_v$ , and a rotational wave function  $\psi_r$  ( $\Psi = \psi_e \cdot \psi_v \cdot \psi_r$ ). Assuming that the three wavefunctions are independent from each other, the wave equation can be simplified into three different equations. Under this assumption, for an electronic transition to be allowed, the integral  $\int \psi_i \hat{\mu} \psi_j d\tau$  should be nonzero for the initial and final electronic states and the dipole polarization direction  $x$ ,  $y$  or  $z$ . According to the symmetry-adapted selection rules, this integral will be nonzero if the direct product of the point group representations of the initial and final electronic wavefunctions and the transition dipole moment operator contains the totally symmetric representation. Since the initial electronic state is totally symmetric, the electric dipole transition will be allowed with  $x$ ,  $y$  or  $z$  polarization if the final state shares the same representation as the  $x$ ,  $y$  or  $z$  linear functions, respectively. For instance, in the  $D_{2h}$  point group, the totally symmetric initial state belongs to the  $A_g$  representation and the  $x$ ,  $y$  and  $z$  linear functions independently belong to the  $B_{3u}$ ,  $B_{2u}$  and  $B_{1u}$  representations respectively. When the  $\beta$  peak is excited, which belongs to the  $B_{1u}$  representation, dipole response only along the  $z$  axis can be expected from the above selection rules.

$$I \propto \int \psi_i \hat{\mu} \psi_j d\tau \quad \#(S1)$$

If the initial and final states account for coupling of the electronic ( $e$ ) and vibrational ( $v$ ) wavefunctions, the integral would now look like eq S2. Since both the ground electronic and vibrational wavefunctions are totally symmetric, the symmetries of both the excited electronic and vibrational states must be considered.

$$\int (\psi_i^e \psi_i^v) \hat{\mu} (\psi_j^e \psi_j^v) d\tau \quad \#(S2)$$

In the case where the electrons are excited along the  $z$  axis with excitation of normal mode 35, the representations of the final electronic and vibrational states can be identified as  $B_{1u}$  and  $B_{2g}$  respectively. The direct product of these representations ( $B_{1u} \otimes B_{2g}$ ) then gives rise to a  $B_{3u}$  representation, meaning that the coupling between these electronic and vibrational states yields a dipole response along the  $x$  cartesian direction. Therefore, activation of the  $x$ -component of the dipole moment is allowed via vibronic coupling when the  $B_{2g}$  vibrational mode is activated along with excitation of a  $B_{1u}$  electronic state. Likewise,  $B_{3g}$  vibrational modes coupled with the  $B_{1u}$  electronic state can give rise to  $B_{2u}$  electronic states that are polarized along the  $y$  direction.

When the electronic and vibrational excited states belong to  $B_{1u}$  (in the case of mode 32), the direct product representation becomes  $A_g$ . However, this totally symmetric excitation is dipole-forbidden in a molecule with  $D_{2h}$  symmetry like naphthalene.

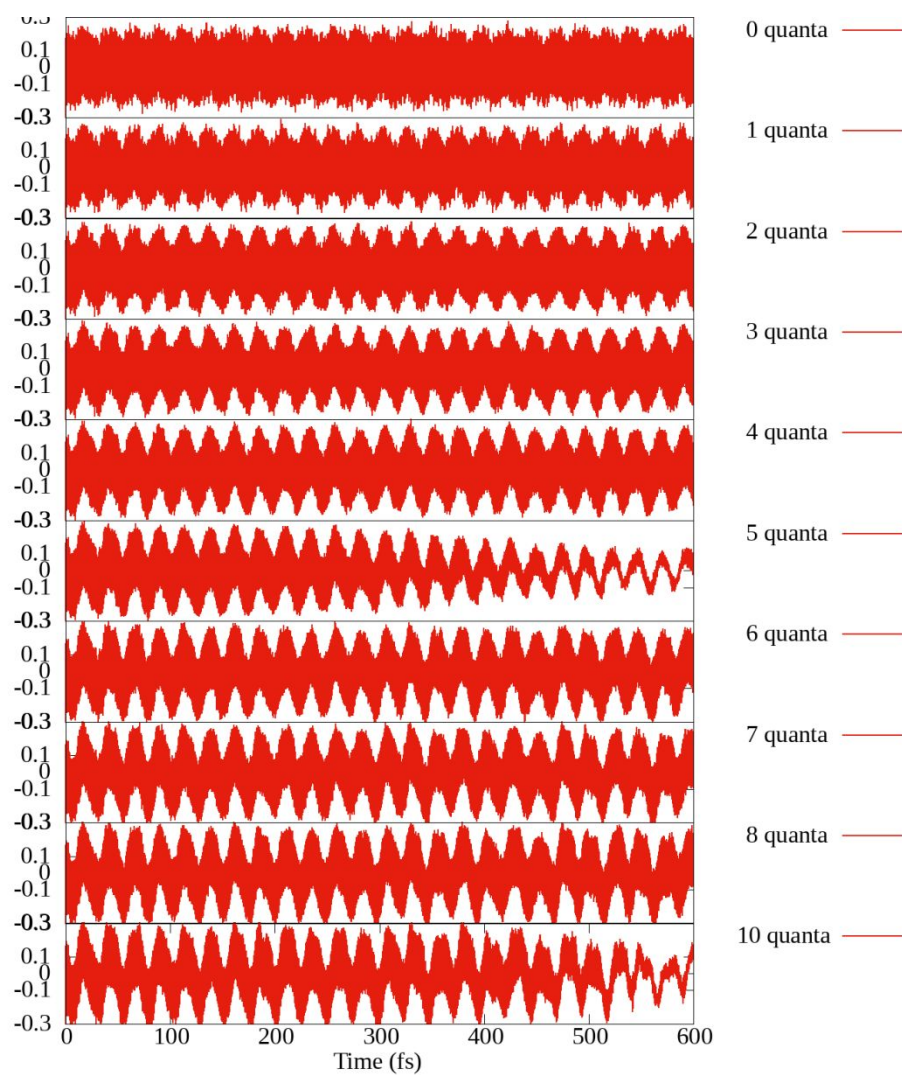

**Figure S2.**  $z$ -component of the dipole moment when mode 32 ( $B_{1u}$ ) is activated with different number of quanta.

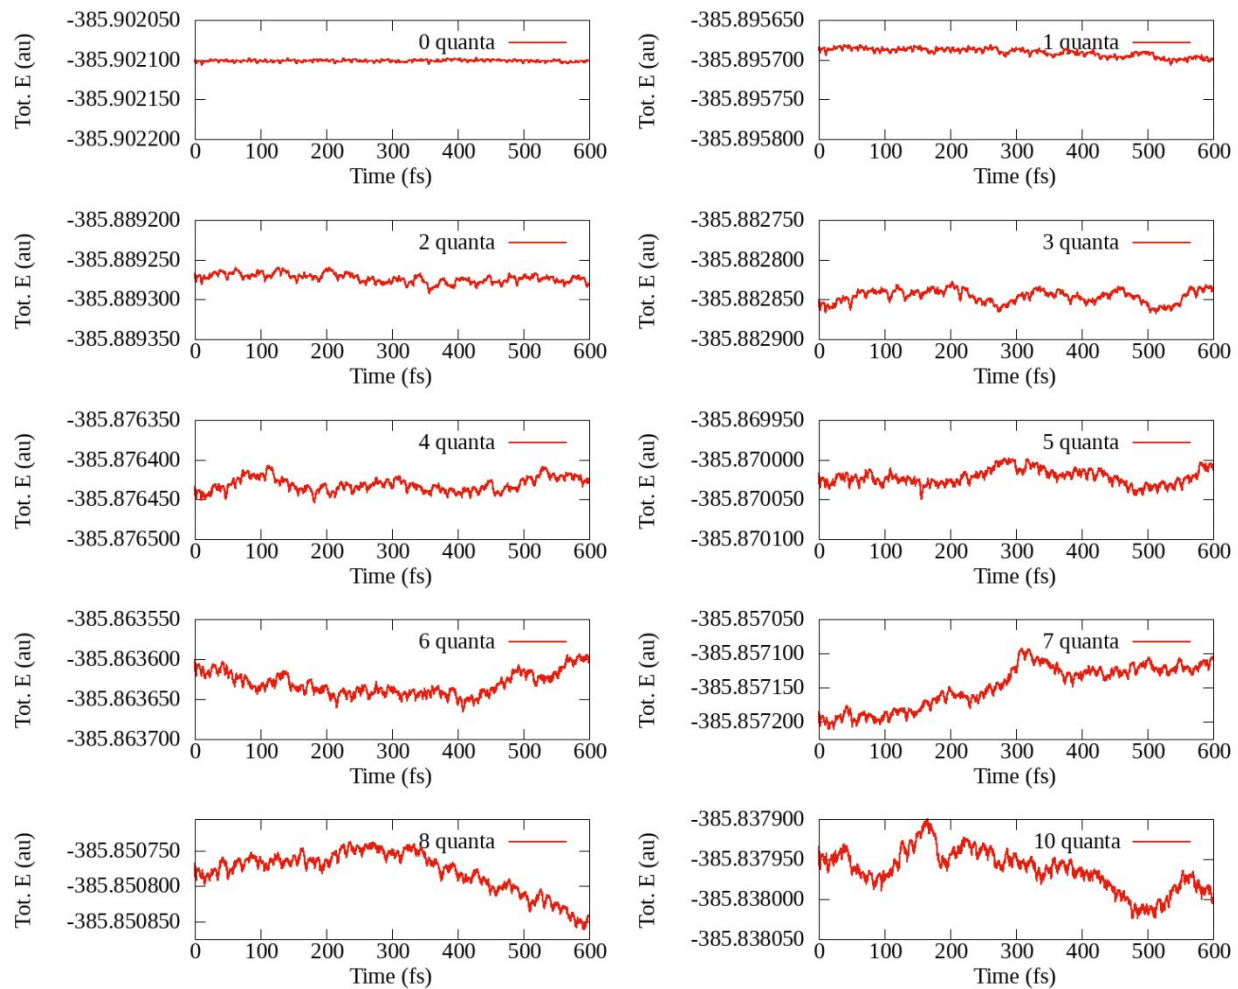

**Figure S3.** Total energy conservation during an Ehrenfest molecular dynamics simulation when mode 32 ( $B_{1u}$ ) is activated with different numbers of quanta.



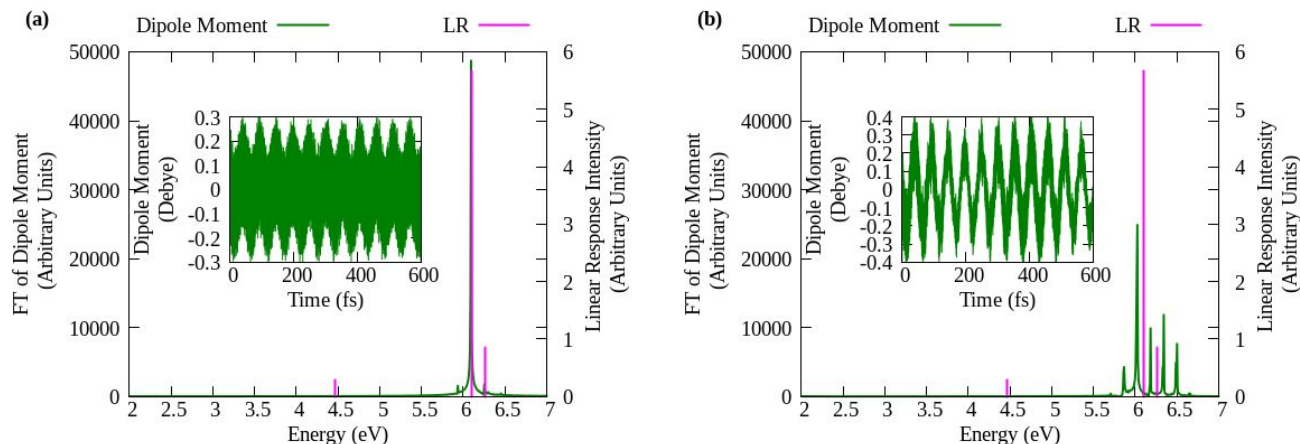

**Figure S4.** Fourier transform of the z-component of the dipole moment (green) when mode 10 ( $B_{1u}$ ) is activated with (a) 0 quanta and (b) 5 quanta compared with the LR-TDDFT stick spectrum (pink). The insets show the time variation of the dipole moment.

**Table S4.** B3LYP/6-31G(d,p) MO transitions responsible for the peaks at 5.96 eV and 6.46 eV for the most distorted geometry of naphthalene during activation of normal mode 10 (geometry at 40.0 fs). Note that the transitions with  $A_g$  irreducible representation in  $D_{2h}$  point group symmetry are forbidden, but they become allowed when the structural symmetry is lowered to  $C_{2v}$  because the transitions with  $A_1$  representation are allowed in  $C_{2v}$  point group symmetry.

| Energy (eV) | Wavelength (nm) | Oscillator strength | Transitions                     | Symmetry of Transitions |          | Weight |
|-------------|-----------------|---------------------|---------------------------------|-------------------------|----------|--------|
|             |                 |                     |                                 | $D_{2h}$                | $C_{2v}$ |        |
| 5.96        | 207.92          | 0.8781              | HOMO – 2 $\rightarrow$ LUMO + 1 | $A_g$                   | $A_1$    | 0.174  |
|             |                 |                     | HOMO – 1 $\rightarrow$ LUMO     | $B_{1u}$                | $A_1$    | -0.452 |
|             |                 |                     | HOMO – 1 $\rightarrow$ LUMO + 2 | $A_g$                   | $A_1$    | -0.216 |
|             |                 |                     | HOMO $\rightarrow$ LUMO + 1     | $B_{1u}$                | $A_1$    | 0.465  |
| 6.46        | 192.05          | 0.3060              | HOMO – 3 $\rightarrow$ LUMO     | $A_g$                   | $A_1$    | -0.135 |
|             |                 |                     | HOMO – 2 $\rightarrow$ LUMO + 1 | $A_g$                   | $A_1$    | 0.466  |
|             |                 |                     | HOMO – 1 $\rightarrow$ LUMO     | $B_{1u}$                | $A_1$    | 0.190  |
|             |                 |                     | HOMO – 1 $\rightarrow$ LUMO + 2 | $A_g$                   | $A_1$    | -0.428 |
|             |                 |                     | HOMO $\rightarrow$ LUMO + 1     | $B_{1u}$                | $A_1$    | -0.199 |

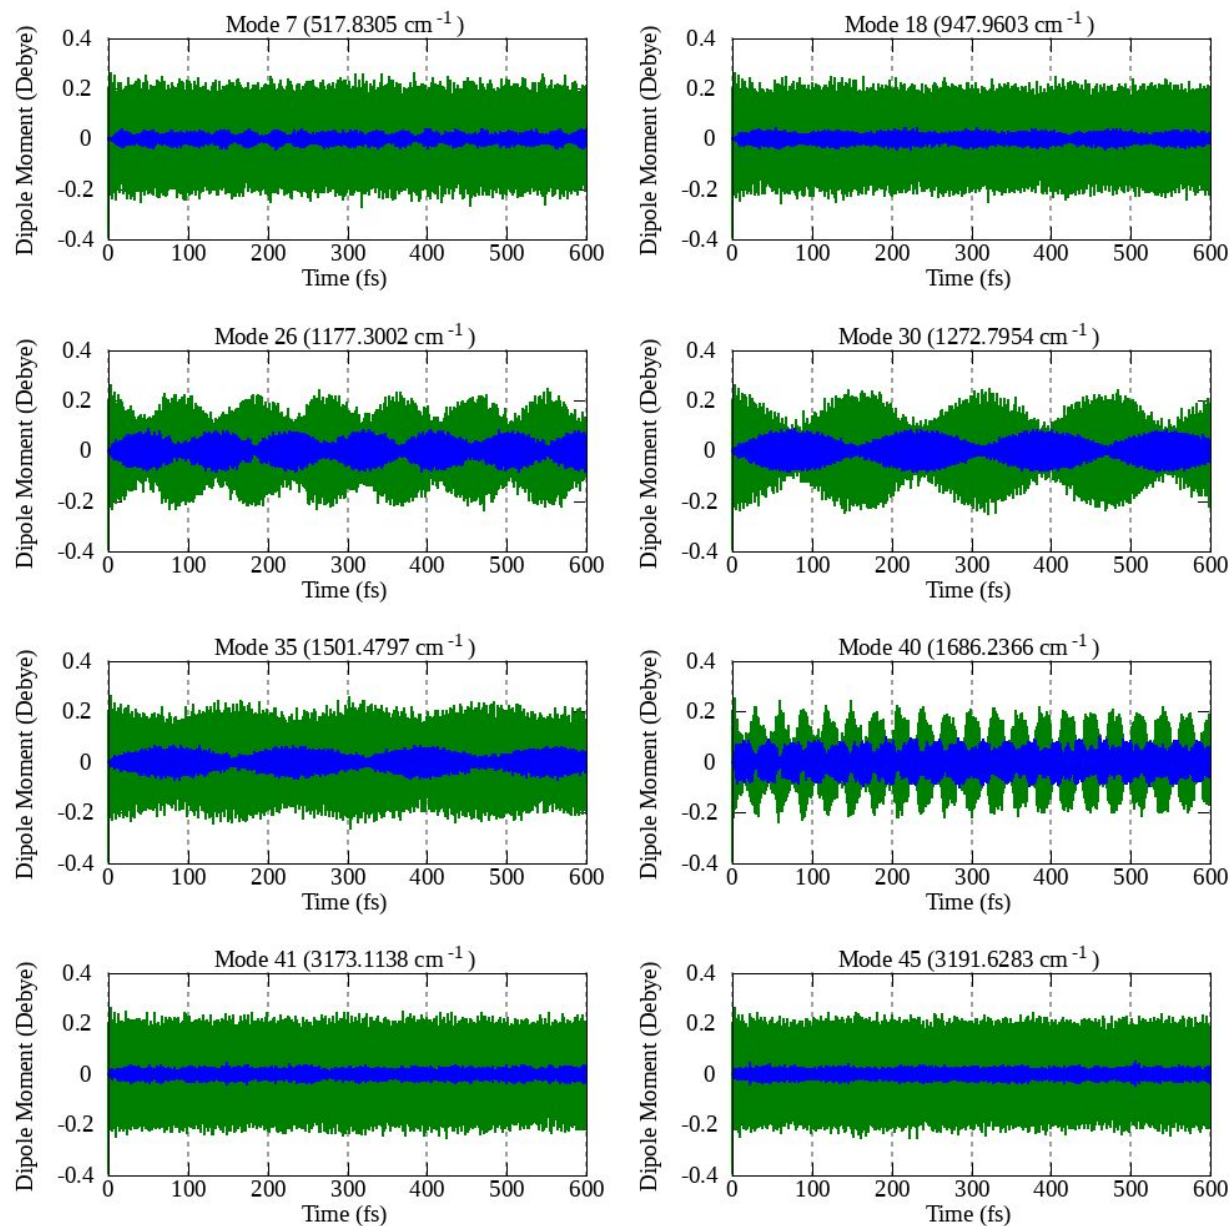

**Figure S5.** Variation of dipole moment during an Ehrenfest dynamics with electrons excited along the  $z$  direction and  $B_{2g}$  normal modes of naphthalene are activated with zero quanta. green:  $z$ -component; blue:  $x$ -component of the dipole moment.

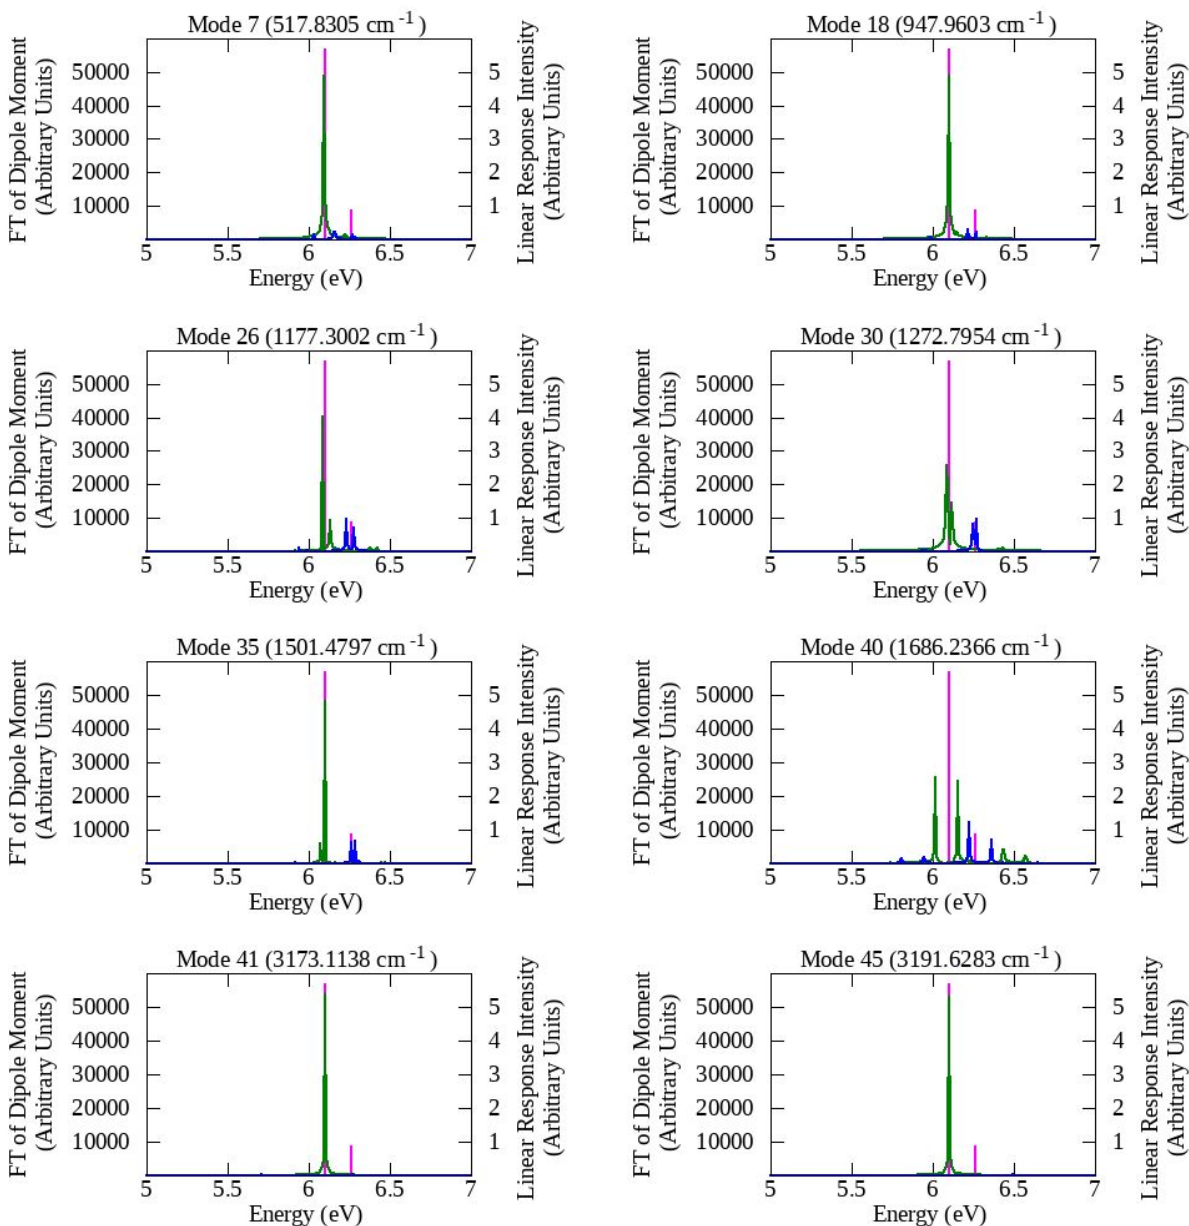

**Figure S6.** Fourier transforms of dipole moment components during an Ehrenfest dynamics with electrons excited along the  $z$  direction and  $B_{2g}$  normal modes of naphthalene are activated with zero quanta. Peak positions are compared with the LR-TDDFT excitation energy positions. green:  $z$ -component; blue:  $x$ -component of the dipole moment; pink: LR-TDDFT stick spectrum.

## Reference

- (1) Cotton, F. A., *Chemical Applications of Group Theory*. 3rd ed.; Wiley: New York, 1990.
